# Supplementary material for: Glycine acylation and trafficking of a new class of bacterial lipoprotein by a composite secretion system
Source: eLife. 2021 Feb 24;10:e63762. doi: 10.7554/eLife.63762 (PMC7943197; doi:10.7554/eLife.63762)
Supplement: Supplementary file 3. [file elife-63762-supp3.xlsx]

## Sheet: Sheet1
Strain	Description	Source
ETEC H10407	Prototypical enterotoxigenic strain. CFA/1+, LT+, ST+	Evans and Evans (1973)
ETEC H10407ΔaatP	aatP deletion mutant	This study
ETEC H10407ΔaatA	aatA deletion mutant	This study
ETEC H10407ΔaatB	aatB deletion mutant	This study
ETEC H10407ΔaatC	aatC deletion mutant	This study
ETEC H10407ΔaatD	aatD deletion mutant	This study
ETEC H10407ΔcexE	cexE deletion mutant	This study
E. coli DH5α	Cloning strain	NEB
E. coli BL21(DE3)	Protein production strain	Invitrogen
EAEC 042	Prototypical enteroaggregative strain. AAF/1+, EAST1+, Pet+	Nataro et al. (1985)
EAEC 042∆aap	EAEC 042 with pJB5603 inserted into aap	Sheikh et al. (2002)
EAEC 042∆aatD	EAEC 042 with pJB5603 inserted into aatD	Nishi et al. (2003)
