# Supplementary material for: Glycine acylation and trafficking of a new class of bacterial lipoprotein by a composite secretion system
Source: eLife. 2021 Feb 24;10:e63762. doi: 10.7554/eLife.63762 (PMC7943197; doi:10.7554/eLife.63762)
Supplement: Supplementary file 4. [file elife-63762-supp4.xlsx]

## Sheet: Sheet1
Name	Sequence	Description
CcexE-F	GGCGGCCATATGAAAAAATATATATTAGGTGT	Cloning cexE from ETEC H10407 into pET26(b)
CcexE-R	CGAAGCCTCGAGTTTATACCAATAAGGGGTGT	Cloning cexE from ETEC H10407 into pET26(b)
GDaatP-F	GAATTCAAGCTTGCAAAGCGTATTGTTGGTGCAGGCTTGTATAAGTTATATGGACCGGTCAATTGGCTGGAG	Forward primer for generating kanamycin cassette and disruption of aatP gene in ETEC H10407
GDaatP-R	GAGCTCCATATGAATATAAATATAATCTTCATGAAAATCTTTCTTTTATTAAAATATCCTCCTTAGTTCC	Reverse primer for generating kanamycin cassette and disruption of aatP gene in ETEC H10407
GDaatA-F	GAATTCAAGCTTGATTTATCAATCTTAATAAAAGAAAGATTTTCATGAAGAGACCGGTCAATTGGCTGGAG	Forward primer for generating kanamycin cassette and disruption of aatA gene in ETEC H10407
GDaatA-R	GAGCTCCATATGTATATAATTCAATTTCATTTTCCTTTTTTATTAACTCTCAATATCCTCCTTAGTTCC	Reverse primer for generating kanamycin cassette and disruption of aatA gene in ETEC H10407
GDaatB-F	GAATTCAAGCTTGAATTATATAAAATGCATATGTTTTTTATTGGTTAGTTTGACCGGTCAATTGGCTGGAG	Forward primer for generating kanamycin cassette and disruption of aatB gene in ETEC H10407
GDaatB-R	GAGCTCCATATGATCAATACTTAATTTAATCATGTAGTGTTATCTCAAATGCTGAATATCCTCCTTAGTTCC	Reverse primer for generating kanamycin cassette and disruption of aatB gene in ETEC H10407
GDaatC-F	GAATTCAAGCTTCTTGGATACAGCATTTGAGATAACACTACATGATTAAATTAGACCGGTCAATTGGCTGGAG	Forward primer for generating kanamycin cassette and disruption of aatC gene in ETEC H10407
GDaatC-R	GAGCTCCATATGAAATCACATAAAATTTTTATTAAAAGGATATAACCTTCATAATATCCTCCTTAGTTCC	Reverse primer for generating kanamycin cassette and disruption of aatC gene in ETEC H10407
GDaatD-F	GAATTCAAGCTTTCGTATATTGGCATTAAATTATCTTTTGAATTGATTAATGGACCGGTCAATTGGCTGGAG	Forward primer for generating kanamycin cassette and disruption of aatD gene in ETEC H10407
GDaatD-R	GAGCTCCATATGACCAAATGATGTATATGGTTTATACATCAATGACAAAAAAAATATCCTCCTTAGTTCC	Reverse primer for generating kanamycin cassette and disruption of aatD gene in ETEC H10407
cexE-F1	GGGTTAAGTGATAACAGGCG	Forward flanking primer of cexE gene in ETEC H10407
cexE-R1	GCACCAACAATACGCTTTGC	Reverse flanking primer of cexE gene in ETEC H10407
aatP-F1	TACAATGTCGGGACTCAACC	Forward flanking primer of aatP gene in ETEC H10407
aatP-R1	ACATACGCAAATGCGGATGG	Reverse flanking primer of aatP gene in ETEC H10407
aatA-F1	CATCAGGTTGAGTTACTCGC	Forward flanking primer of aatA gene in ETEC H10407
aatA-R1	CATTGTAAGCATTGCTGGCG	Reverse flanking primer of aatA gene in ETEC H10407
aatB-F1	CATTCCGCTAAGTGGATTGC	Forward flanking primer of aatB gene in ETEC H10407
aatB-R1	ATATCCGACACATCACTCCC	Reverse flanking primer of aatB gene in ETEC H10407
aatC-F1	GTAATCCACATGTGCAAGGG	Forward flanking primer of aatC gene in ETEC H10407
aatC-R1	TGCCGTAGTTATTCGTGAGG	Reverse flanking primer of aatC gene in ETEC H10407
aatD-F1	CTCCCTCTATAGTGTGTAGC	Forward flanking primer of aatD gene in ETEC H10407
aatD-R1	TCTGGCGTCCATTCATTTCC	Reverse flanking primer of aatD gene in ETEC H10407
RM_cexE_3-RV	ACCACCACCCGCAATCG	Remove all of cexE apart from the last 3 N-terminal glycine residues
RM_cexE_2-RV	ACCACCCGCAATCGCGC	Remove all of cexE apart from the last 2 N-terminal glycine residues
RM_cexE_1-RV	ACCCGCAATCGCGCTCAGG	Remove all of cexE apart from the last 1 N-terminal glycine residues
RM_cexE-RV	CGCAATCGCGCTCAGGCTACC	Remove all of cexE apart from the signal sequence.
RM_cexE-FW	GTTAGCAAGGGCGAGGAAGATAAC	Forward primer for removing cexE from CexE-mCherry fusion.
G20E-F	TCCGCGATAGCTGAAGGCGGTAATTC	Substitution mutant G20E of cexE
G20E-R	GAATTACCGCCTTCAGCTATCGCGGA	Substitution mutant G20E of cexE
G21E-F	GCGATAGCTGGAGAAGGTAATTCTGAACG	Substitution mutant G21E of cexE
G21E_R	CGTTCAGAATTACCTTCTCCAGCTATCGC	Substitution mutant G21E of cexE
G22E-F	GATAGCTGGAGGCGAGAATTCTGAACG	Substitution mutant G22E of cexE
G22E-R	CGTTCAGAATTCTCGCCTCCAGCTATC	Substitution mutant G22E of cexE
N23E-RH-F	GAATCTGAACGACCGCCTTCCG	Substitution mutant N23E of cexE
N23-RH-R	ACCGCCTCCAGCTATCGCG	Reverse primer for both N23A and N23E substitution mutants
S24E-F	GGAGGCGGTAATGAAGAACGACCGCC	Substitution mutant S24E of cexE
S24E-R	GGCGGTCGTTCTTCATTACCGCCTCC	Substitution mutant S24E of cexE
H10407_E217A-FW	CGACATCGATATGGTGGTTTTTAGCGCGAACACCGTGTACGGTTTCAAGAACCAG	Substitution mutant E217A of aatD
H10407_E217A-RV	CTGGTTCTTGAAACCGTACACGGTGTTCGCGCTAAAAACCACCATATCGATGTCG	Substitution mutant E217A of aatD
H10407_K278A-FW	CTATTACAAAGACAACTTCCTGATCAACCAAGCGAAAGCGCTGATTCCGTTTGTTGAGCAGC	Substitution mutant K278A of aatD
H10407_K278A-RV	GCTGCTCAACAAACGGAATCAGCGCTTTCGCTTGGTTGATCAGGAAGTTGTCTTTGTAATAG	Substitution mutant K278A of aatD
H10407_E286A-FW	GCGCTGATTCCGTTTGTTGCGCAGCAATGGTTCTTTAGC	Substitution mutant E286A of aatD
H10407_E286A-RV	GCTAAAGAACCATTGCTGCGCAACAAACGGAATCAGCGC	Substitution mutant E286A of aatD
H10407_C325A-FW	CAACCACAACGGTATCAACATTAAGACCTATATTGCGTACGATGTTCTGTTCCCGGAAACCCATAAAAGC	Substitution mutant C325A of aatD
H10407_C325A-RV	GCTTTTATGGGTTTCCGGGAACAGAACATCGTACGCAATATAGGTCTTAATGTTGATACCGTTGTGGTTG	Substitution mutant C325A of aatD
T7F	TAATACGACTCACTATAGGG	Forward primer for amplification of pET26b(+) multiple cloning site
T7R	GCTAGTTATTGCTCAGCGG	Reverse primer for amplification of pET26b(+) multiple cloning site
