# Supplementary material for: Glycine acylation and trafficking of a new class of bacterial lipoprotein by a composite secretion system
Source: eLife. 2021 Feb 24;10:e63762. doi: 10.7554/eLife.63762 (PMC7943197; doi:10.7554/eLife.63762)
Supplement: Supplementary file 5. [file elife-63762-supp5.xlsx]

## Sheet: Sheet1
Plasmid	Description	Source
pDOC-K	contains bla and kanR with FRT sites	Lee et al. (2009)
pKD46	Heat sensitive plasmid encoding λ Red recombinase genes expressed in response to L-arabinose	Datsenko and Wanner (2000)
pCP20	Heat sensitive plasmid encoding Flp recombinase gene	Datsenko and Wanner (2000)
pET26b(+)	T7 expression vector with C-terminal 6His tag, IPTG inducible, kanR	Novagen
pET26b-cexE	pET26b with cexE from ETEC H10407	This study
pBAD/myc-HisA	L-arabinose expression vector with C-terminal Myc and 6His tag	Invitrogen
pJNW	Complete aat gene cluster from EAEC 042 cloned into pZC320	Nishi et al. (2003)
pCfaD	pBAD/myc-HisA with cfaD under PBAD from ETEC H10407	This study
pACYC184	Plasmid with p15A origin of replication	Chang and Cohen (1978)
pACYC-cexE-6His	pACYC184 with cexE under the control of the native cexE promoter with a C-terminal 6 His tag	This study
pACYCDuet-1	Plasmid with p15A origin of replication and two T7 promoters.	Novagen
pACYC-aatD	The ETEC H10407 aatD gene was synthesised by Genscript and transformed in pACYCDuet-1	This study
pRSF-GGG-mCherry	mCherry with three glycine residues at the N-terminus after the CexE signal sequence	This study
pRSF-GG-mCherry	mCherry with two glycine residues at the N-terminus after the CexE signal sequence	This study
pRSF-G-mCherry	mCherry with one glycine residue at the N-terminus after the CexE signal sequence	This study
pRSF-SS-mCherry	mCherry with the CexE signal sequence	This study
